# Supplementary material
Source: Elsevier journal article supplement (https://www.sciencedirect.com/science/article/pii/S0211699517301066)
Supplement: mmc1 [file S0211699517301066:mmc1.pdf]

## Supplementary Tables

**Table 1S.** Biochemical parameters accord sex

| Variable                                       | Total<br><br>n = 44 | Male<br><br>n=14 (31.8% ) | Female<br><br>n= 30 (68.1%) | p Value |
|------------------------------------------------|---------------------|---------------------------|-----------------------------|---------|
| Serum urea [mg/dl, means $\pm$ SD]             | 44.74 $\pm$ 40.49   | 63.62 $\pm$ 56.39         | 35.39 $\pm$ 27.45           | 0.100   |
| Serum creatinine [mg/dl, means $\pm$ SD]       | 1.36 $\pm$ 1.95     | 2.097 $\pm$ 1.75          | 1.02 $\pm$ .60              | 0.041   |
| Serum albumin [g/dl, means $\pm$ SD]           | 3.0 $\pm$ 1.37      | 2.98 $\pm$ 1.4            | 3.01 $\pm$ 1.34             | 0.948   |
| 24-hour urine protein [g/24 h, means $\pm$ SD] | 4.22 $\pm$ 6.03     | 6.29 $\pm$ 8.433          | 3.25 $\pm$ 4.36             | 0.121   |
| Complement C3 [mg/dl, means $\pm$ SD]          | 83.98 $\pm$ 28.78   | 91.5 $\pm$ 25.6           | 80 $\pm$ 29.7               | 0.240   |
| Complement C4 [mg/dl, means $\pm$ SD]          | 18.2 $\pm$ 8.01     | 22.1 $\pm$ 9.1            | 16.41 $\pm$ 6.86            | 0.026   |
| uTWEAK [pg/mg Cr, means $\pm$ SD]              | 5.92 $\pm$ 6.2      | 2.86 $\pm$ 2.09           | 7.35 $\pm$ 7.0              | 0.003   |
